# Supplementary material for: Choline chloride–formic acid mixture as a medium for the reduction of pertechnetates – electrochemical and spectroscopic studies
Source: Royal Society of Chemistry journal article supplement (doi:10.1039/d2cp05398e), 2022-12-12
Supplement: d2cp05398e1.pdf [file d2cp05398e1.pdf]

## Electronic Supplementary Information

### Choline chloride-formic acid mixture as a medium for the reduction of pertechnetates – electrochemical and spectroscopic studies

Damian Połomski<sup>a</sup>, Nicole A. DiBlasi<sup>b</sup>, Kathy Dardenne<sup>b</sup>, Xavier Gaona<sup>b</sup>, Kenneth Czerwinski<sup>c</sup>, Maciej Chotkowski<sup>a\*</sup>

<sup>a</sup> University of Warsaw, Faculty of Chemistry, Żwirki i Wigury 101, 02-089 Warsaw, Poland

<sup>b</sup> Karlsruhe Institute of Technology, Institute for Nuclear Waste Disposal, Hermann-von-Helmholtz-Platz 1, Eggenstein-Leopoldshafen 76344 Germany

<sup>c</sup> Radiochemistry Group, University of Nevada, Las Vegas, NV 89154, USA

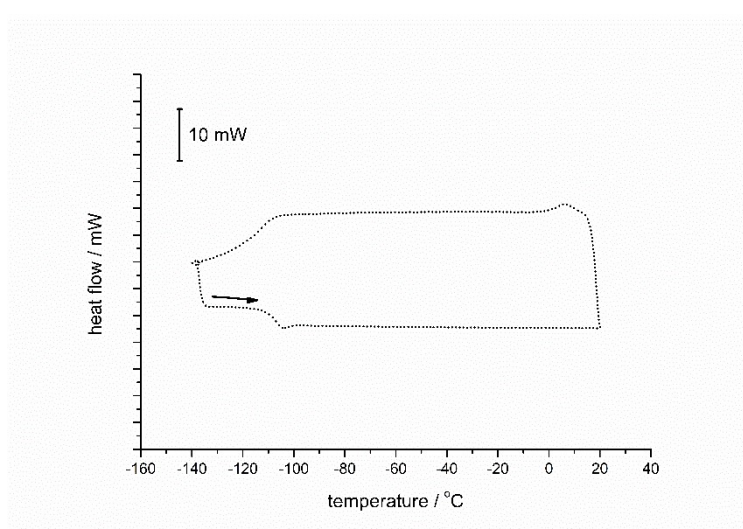

DSC thermogram of 1-year aged ChCl:FA (1:2 mol. ratio, 15.500 mg) sample.

| 1-year aged sample<br>ChCl:FA |                                       | freshly prepared sample<br>ChCl:FA |                                       |
|-------------------------------|---------------------------------------|------------------------------------|---------------------------------------|
| Onset                         | -110,83 °C                            | Onset                              | -111,57 °C                            |
| Midpoint                      | -108,50 °C                            | Midpoint                           | -109,16 °C                            |
| Inflect. Pt.                  | -106,90 °C                            | Inflect. Pt.                       | -107,69 °C                            |
| Endpoint                      | -106,00 °C                            | Endpoint                           | -106,72 °C                            |
| Inflect. Slp.                 | -0,59 mW°C <sup>-1</sup>              | Inflect. Slp.                      | -0,30 mW°C <sup>-1</sup>              |
| Delta Cp                      | 0,82 Jg <sup>-1</sup> K <sup>-1</sup> | Delta Cp                           | 0,83 Jg <sup>-1</sup> K <sup>-1</sup> |
| Left Limit                    | -118,71 °C                            | Left Limit                         | -124,12 °C                            |
| Right Limit                   | -94,21 °C                             | Right Limit                        | -90,13 °C                             |

S1. Characteristics of the glass transition points observed for ChCl:FA samples.

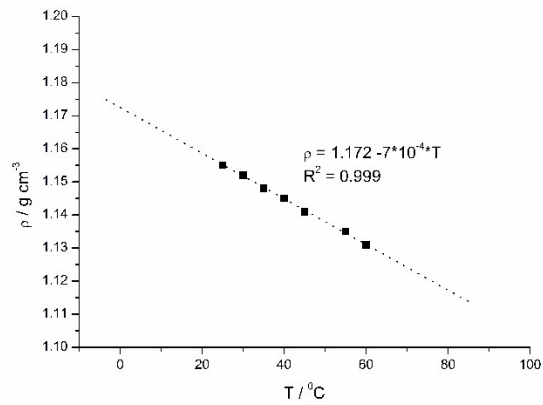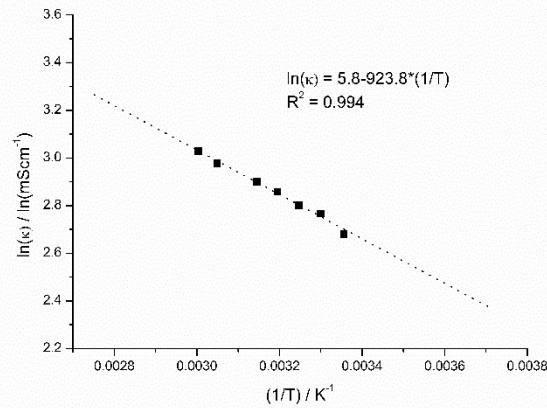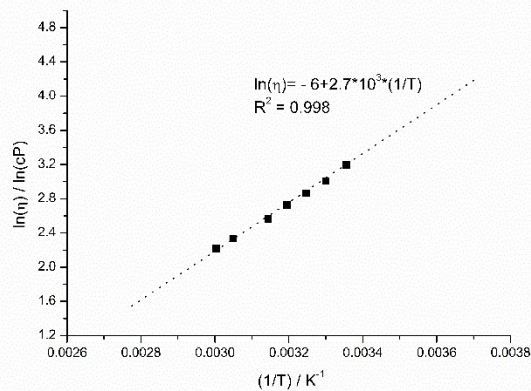

Dynamic viscosity ( $\eta$ ) is related to the density ( $\rho$ ) and kinematic viscosity ( $\nu$ ) of the solution according to the equation:  $\eta = \nu * \rho$ .

$\nu = 41 \text{ cSt}$  and  $\kappa = 11 \text{ mS}\cdot\text{cm}^{-1}$  at  $0 \text{ }^\circ\text{C}$

S2. A temperature impact on the density ( $\rho$ ), conductivity ( $\kappa$ ) and dynamic viscosity ( $\eta$ ) for ChCl:FA mixture.

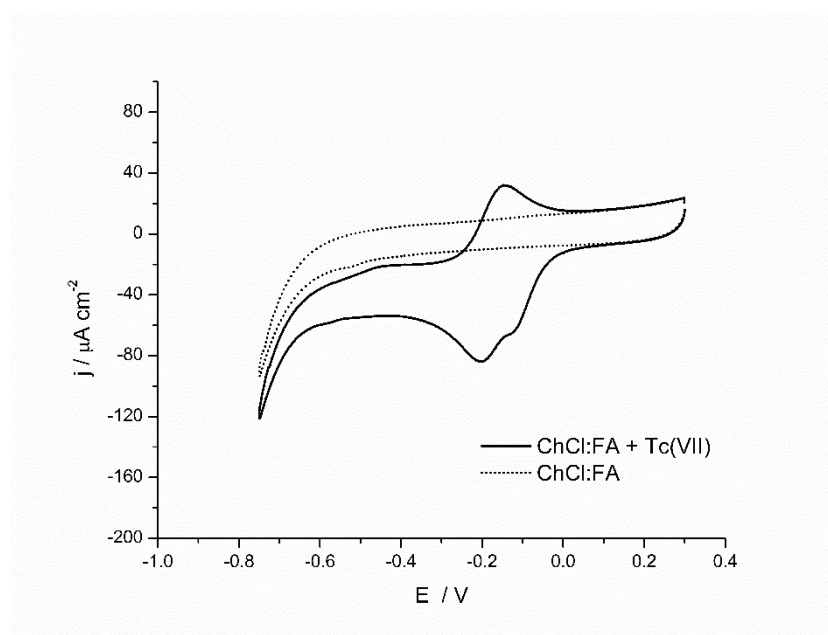

S3. Cyclic voltammogram recorded in ChCl:FA at glassy carbon disk electrode,  $T = 25^\circ\text{C}$ , scan rate =  $50 \text{ mVs}^{-1}$ .

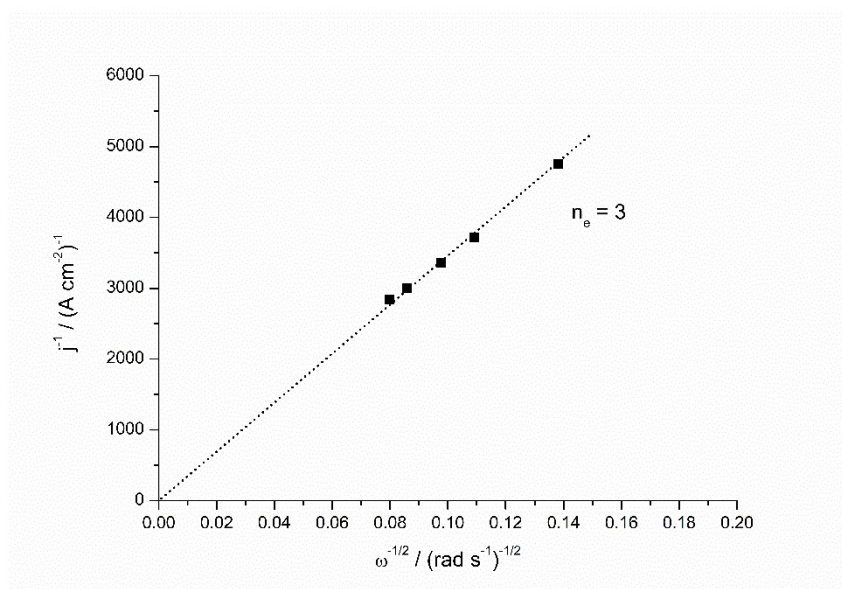

S4. Koutecky-Levich plots for the limiting current of 1.2 mM Tc reduction in ChCl:FA at glassy carbon rotating disk electrode (RDE),  $T = 25^\circ\text{C}$ , scan rate =  $250 \text{ mVmin}^{-1}$ .

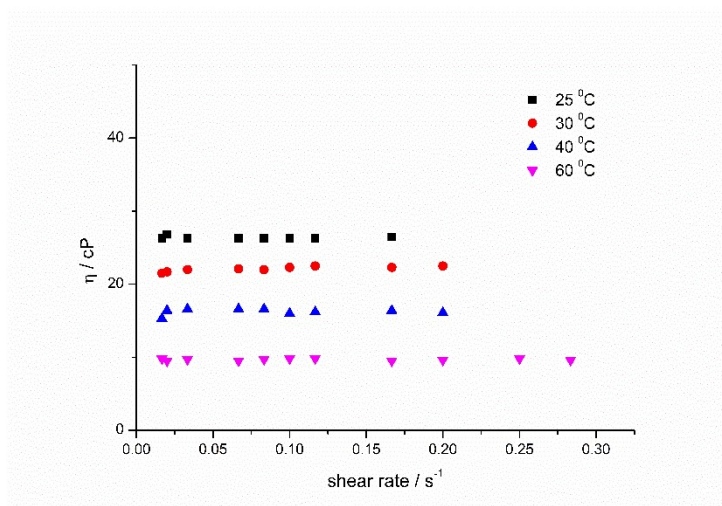

S5. Dynamic viscosity ( $\eta$ ) vs. shear rate of ChCl:FA mixture at various temperatures.

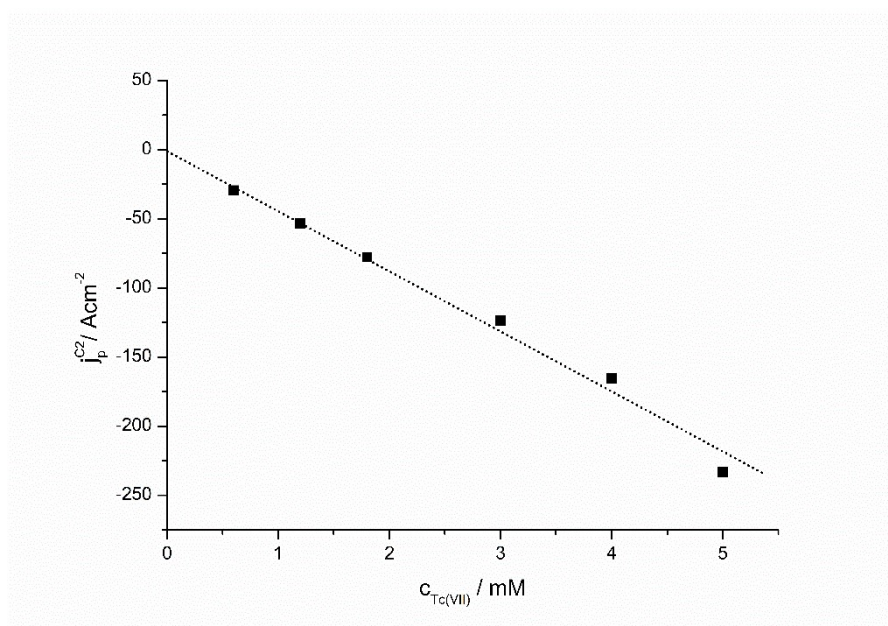

S6. Peak current density (calculated for peak c2 shown in Fig. 5) as a function of  $Tc(VII)$  concentration,  $T = 25\text{ }^{\circ}C$ , scan rate =  $50\text{ mVs}^{-1}$ .

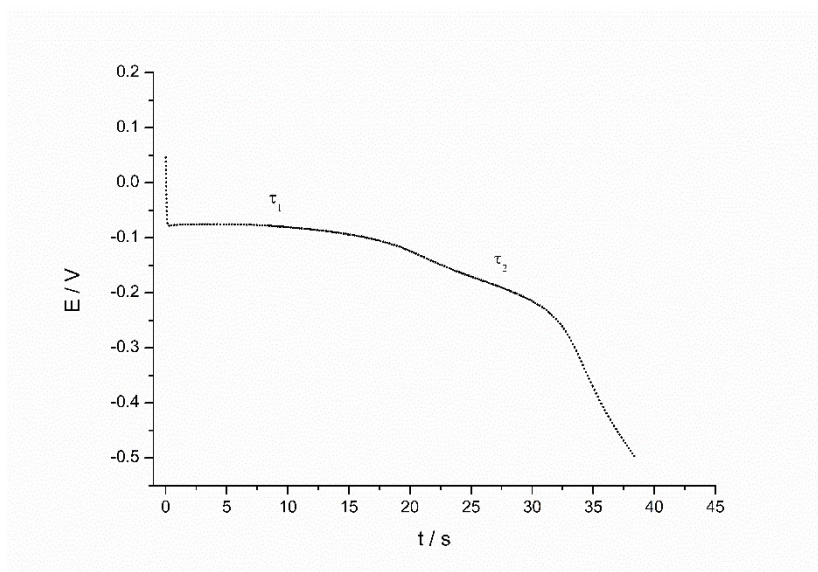

S7. Chronopotentiometry curve recorded in ChCl:FA with addition of 1.2 mM Tc, current = 1.8  $\mu$ A, T = 25  $^{\circ}$ C.
